# Supplementary material for: Beautiful friendship: Social sharing of emotions improves subjective feelings and activates the neural reward circuitry
Source: PubMed Central journal article supplement (PMC4448023; doi:10.1093/scan/nsu121), 2014-10-08
Supplement: supp_nsu121_scan-14-081-File002.pdf [file supp_nsu121_scan-14-081-File002.pdf]

## **Supplementary Material for:**

### **Beautiful friendship: Social sharing of emotions improves subjective feelings and activates the neural reward circuitry**

Ullrich Wagner<sup>1,2\*</sup>, Lisa Galli<sup>1\*</sup>, Björn H. Schott<sup>1</sup>, Andrew Wold<sup>1,3</sup>, Job van der Schalk<sup>4</sup>, Antony Manstead<sup>4</sup>, Klaus Scherer<sup>5</sup> & Henrik Walter<sup>1</sup>

<sup>1</sup> Charité – Universitätsmedizin Berlin, Department of Psychiatry and Psychotherapy, Division of Mind and Brain Research, Berlin, Germany

<sup>2</sup> University of Münster, Department of Psychology, Germany

<sup>3</sup> Berlin School of Mind and Brain, Berlin, Germany

<sup>4</sup> Cardiff University, School of Psychology, Cardiff, UK

<sup>5</sup> Swiss Center for Affective Sciences, Geneva, Switzerland

\*equal contribution

## **Supplementary Results**

### ***Arousal***

Although our hypothesis referred to the valence dimension of emotion, we also obtained after each picture subjective ratings of arousal as the second primary emotion dimension commonly assessed in emotion research (Lang et al., 2005). Regarding arousal ratings, we did not observe any social sharing effects overall (emotional:  $M=-0.035$ ,  $SEM=0.078$ ;  $t(57)=-0.451$ ,  $p=0.654$ ; including neutral:  $M=0.032$ ,  $SEM=0.072$ ;  $t(57)=0.456$ ,  $p=0.650$ ) or when considering positive, negative, and neutral pictures separately (positive:  $M=-0.060$ ,  $SEM=0.111$ ;  $t(57)=-0.548$ ,  $p=0.586$ ; negative:  $M=-0.010$ ,  $SEM=0.079$ ;  $t(57)=-0.126$ ,  $p=0.90$ ; neutral:  $M=0.169$ ,  $SEM=0.103$ ;  $t(57)=1.638$ ,  $p=0.107$ ). (See Supplementary Table S2 for all raw data on subjective ratings of valence and arousal).

## Supplementary Tables

(Supplementary Tables S1, S2, S3)

**Table S1.** Stimulus details. Valence ratings, difference to midpoint of valence scale, and arousal ratings from (Lang et al., 2005). Scales ranging from 1 to 9.

|                       | <b>Valence</b>     |                                      | <b>Arousal</b>     |
|-----------------------|--------------------|--------------------------------------|--------------------|
|                       | Mean (SD)          | Difference to midpoint<br>Mean (SD ) | Mean (SD )         |
| negative face         | 1.67 (1.19)        | 3.33 (0.08)                          | 6.1 (2.4)          |
| negative nonface      | 2.5 (1.55)         | 2.5 (0.34)                           | 5.74 (2.16)        |
| negative inanimate    | 2.7 (1.58)         | 2.3 (0.53)                           | 5.5 (2.2)          |
| <b>negative total</b> | <b>2.29 (1.44)</b> | <b>2.71 (0.32)</b>                   | <b>5.78 (2.26)</b> |
| neutral face          | 5 (1.28)           | 0 (0.11)                             | 3.28 (1.94)        |
| neutral nonface       | 4.98 (1.5)         | -0.02 (0.5)                          | 4.29 (2.09)        |
| neutral inanimate     | 5 (1.01)           | 0 (0.05)                             | 2.79 (1.91)        |
| <b>neutral total</b>  | <b>4.99 (1.26)</b> | <b>-0.01 (0.22)</b>                  | <b>3.45 (1.98)</b> |
| positive face         | 8.32 (1.16)        | 3.32 (0.17)                          | 4.74 (2.58)        |
| positive nonface      | 7.56 (1.47)        | 2.56 (0.55)                          | 5.67 (2.31)        |
| positive inanimate    | 7.37 (1.59)        | 2.37 (0.21)                          | 4.41 (2.41)        |
| <b>positive total</b> | <b>7.75 (1.41)</b> | <b>2.75 (0.31)</b>                   | <b>4.94 (2.44)</b> |

**Table S2.** Subjective ratings of valence and arousal (scale range 0 -12).

| <b>Valence Mean (SEM)</b>  |               |               |                    |                          |
|----------------------------|---------------|---------------|--------------------|--------------------------|
|                            | shared        | unshared      | raw sharing effect | sharing effect corrected |
| negative                   | 3.457 (0.146) | 3.288 (0.155) | 0.168 (0.063)      | 0.088 (0.056)            |
| positive                   | 8.015 (0.134) | 7.921 (0.136) | 0.093 (0.071)      | 0.136 (0.073)            |
| emotional<br>(neg and pos) | 5.736 (0.059) | 5.604 (0.074) | 0.131 (0.045)*     | 0.112 (0.045)*           |
| neutral                    | 6.196 (0.086) | 6.119 (0.082) | 0.076 (0.066)      | 0.064 (0.068)            |
| all                        | 5.888 (0.060) | 5.776 (0.069) | 0.112 (0.035)*     | 0.095 (0.037)*           |

| <b>Arousal Mean (SEM)</b>  |               |               |                    |                          |
|----------------------------|---------------|---------------|--------------------|--------------------------|
|                            | shared        | unshared      | raw sharing effect | sharing effect corrected |
| negative                   | 6.817 (0.242) | 6.865 (0.245) | -0.048 (0.087)     | -0.010 (0.079)           |
| positive                   | 5.545 (0.236) | 5.500 (0.216) | 0.044 (0.094)      | -0.060 (0.111)           |
| emotional<br>(neg and pos) | 6.181 (0.210) | 6.183 (0.203) | -0.001 (0.072)     | -0.035 (0.078)           |
| neutral                    | 4.080 (0.242) | 3.989 (0.223) | 0.090 (0.114)      | 0.169 (0.103)            |
| all                        | 5.481 (0.208) | 5.451 (0.192) | 0.029 (0.073)      | 0.032 (0.072)            |

\* significant effect of social sharing ( $p < 0.05$ ) . The corrected sharing effect takes into account that standard ratings for picture sets used in shared vs. unshared experimental conditions cannot be totally matched within subjects and therefore corrects the raw sharing effect of each participant accordingly (see Methods). Overall statistical patterns are the same for raw sharing effects.

**Table S3.** Regional activation during picture phase. Peak voxels in MNI space,  $p < 0.001$  uncorr.,  $k > 10$ .

| Region                                     | Hem. | BA | Coordinates peak voxel |     |     | T-value | Cluster size |
|--------------------------------------------|------|----|------------------------|-----|-----|---------|--------------|
|                                            |      |    | x                      | y   | Z   |         |              |
| <b><i>unshared_emo &gt; shared_emo</i></b> |      |    |                        |     |     |         |              |
| Lingual gyus                               | R    | 18 | 12                     | -76 | -5  | 4.03    | 40           |
|                                            | L    | 18 | -9                     | -82 | -8  | 3.8     | 27           |
| <b><i>unshared_neu &gt; shared_neu</i></b> |      |    |                        |     |     |         |              |
| Lingual gyrus                              | R    | 18 | 12                     | -57 | 1   | 3.97    | 231          |
|                                            | R    | 18 | 9                      | -61 | -5  | 3.85    |              |
|                                            | R    | 18 | 12                     | -76 | -5  | 3.68    |              |
| <b><i>emo &gt; neu</i></b>                 |      |    |                        |     |     |         |              |
| Frontopolar cortex                         | L    | 10 | -3                     | 62  | -2  | 3.87    | 13           |
|                                            | L    | 10 | 0                      | 56  | 16  | 3.8     | 30           |
|                                            | L    | 10 | -9                     | 65  | 25  | 3.58    |              |
| Anterior cingulate gyrus                   | L/R  | 32 | 0                      | 38  | 7   | 3.73    | 17           |
| Lingual gyrus                              | R    | 18 | 18                     | -91 | -5  | 3.36    | 13           |
| Middle temporal gyrus                      | R    | 37 | 54                     | -70 | 13  | 5.95    | 377          |
|                                            | R    | 37 | 54                     | -58 | 4   | 4.34    |              |
| Amygdala                                   | L    |    | -21                    | -4  | -14 | 4.39    | 157          |
|                                            | R    |    | 21                     | -4  | -14 | 3.94    |              |
| Fusiform gyrus                             | R    | 37 | 42                     | -43 | -14 | 3.79    | 19           |
|                                            | R    | 37 | 30                     | -73 | -5  | 3.56    | 21           |
| Precuneus                                  | L/R  | 23 | 0                      | -52 | 31  | 4.68    | 167          |
|                                            | R    |    | 3                      | -49 | 13  | 3.92    |              |
| Lingual gyrus /Cuneus                      | L    | 18 | -12                    | -94 | -2  | 3.88    | 31           |
|                                            | R    | 18 | 18                     | -91 | -5  | 3.36    | 13           |
| Middle occipital gyrus                     | L    | 19 | -48                    | -76 | 16  | 5.47    | 234          |
| Superior occipital gyrus                   | R    | 19 | 39                     | -82 | 31  | 3.53    |              |
| Midbrain                                   | R    |    | 3                      | -16 | -14 | 3.7     | 11           |
| <b><i>neg &gt; pos</i></b>                 |      |    |                        |     |     |         |              |
| Inferior/medial frontal gyrus              | R    | 48 | 51                     | 23  | 16  | 6.34    | 2365         |
|                                            | R    | 44 | 39                     | 5   | 31  | 6.2     |              |
|                                            | R    | 46 | 57                     | 29  | 16  | 6.16    |              |
|                                            | L    | 6  | -48                    | 2   | 31  | 4.73    | 95           |
|                                            | L    | 44 | -54                    | 14  | 37  | 4.01    |              |
|                                            | L    | 48 | -45                    | 11  | 19  | 3.18    |              |
| Superior frontal gyrus                     | R    | 10 | 12                     | 65  | 28  | 5.76    | 45           |
|                                            | R    | 10 | 15                     | 68  | 19  | 5.35    |              |

|                          |   |    |     |     |     |      |      |
|--------------------------|---|----|-----|-----|-----|------|------|
|                          | L | 32 | -6  | 50  | 25  | 4.8  | 75   |
|                          | L | 9  | -6  | 56  | 40  | 4.17 |      |
|                          | L | 8  | -6  | 41  | 55  | 3.3  |      |
|                          | L | 10 | -12 | 62  | 31  | 4.26 | 11   |
| Inferior temporal /      | L | 37 | -42 | -58 | -8  | 8.92 | 6107 |
| inferior occipital gyrus | R | 37 | 45  | -67 | -8  | 8.8  |      |
|                          | L | 18 | -36 | -88 | 4   | 8.16 |      |
| cluster also including:  |   |    |     |     |     |      |      |
| Amygdala                 | R |    | 21  | -4  | -11 | 5.16 |      |
|                          | L |    | -21 | -4  | -14 | 4.3  |      |
| Hippocampus              | L |    | -27 | -10 | -11 | 4.83 |      |
| Temporal pole            | R | 38 | 48  | 14  | -26 | 3.74 |      |
| Middle temporal gyrus    | R | 21 | 51  | -4  | -17 | 4.23 | 61   |
| Brainstem                |   |    | 0   | -37 | -35 | 3.93 | 34   |

***pos > neg***

|                            |   |    |     |     |    |      |     |
|----------------------------|---|----|-----|-----|----|------|-----|
| Medial orbitofrontal gyrus | R | 11 | 9   | 56  | -5 | 4.77 | 24  |
|                            | R | 47 | 39  | 50  | -5 | 3.79 |     |
|                            | R | 46 | 39  | 47  | 7  | 3.71 |     |
| Anterior cingulate gyrus   | L | 25 | -6  | 35  | 4  | 4.98 | 476 |
|                            | L | 11 | -15 | 44  | -2 | 4.89 |     |
| Cingulate gyrus            | R | 23 | 9   | -13 | 31 | 4    | 59  |
| Hippocampus                | R |    | 21  | -34 | 7  | 4.08 |     |
| Precuneus                  | R | 7  | 9   | -73 | 37 | 5.26 | 387 |
|                            | L | 7  | -9  | -67 | 31 | 4.71 |     |
| Paracentral lobule         | L | 4  | -6  | -19 | 67 | 4    | 153 |
|                            | R | 4  | 3   | -19 | 67 | 3.92 |     |
| Posterior cingulate gyrus  | L | 23 | -6  | -31 | 25 | 3.97 |     |
| Angular gyrus              | R | 39 | 42  | -64 | 43 | 3.68 | 10  |

---

**Table S4.** Activation peaks in OFC used for ROI creation.

| Source                                                   | x   | y   | z   | atlas-type |
|----------------------------------------------------------|-----|-----|-----|------------|
| (Rothkirch, Schmack, Schlagenhaut, & Sterzer, 2012)      | 0   | 26  | -14 | MNI        |
|                                                          | 30  | 38  | -14 | MNI        |
| (Schlagenhaut et al., 2009)                              | 0   | 45  | -12 | MNI        |
|                                                          | -3  | 42  | -18 | MNI        |
|                                                          | -6  | 45  | -18 | MNI        |
| (Walter et al., 2010)                                    | 39  | 21  | -15 | MNI        |
|                                                          | 33  | 30  | -9  | MNI        |
| (Diaconescu et al., 2011)                                | 20  | 20  | -24 | MNI        |
| (Bunzeck, Dayan, Dolan, & Duzel, 2010)                   | 10  | -24 | -18 | MNI        |
| (Bunzeck, Doeller, Dolan, & Duzel, 2012)                 | 6   | 48  | -20 | MNI        |
|                                                          | 0   | 46  | -26 | MNI        |
|                                                          | -4  | 36  | -26 | MNI        |
|                                                          | 4   | 40  | -28 | MNI        |
| (Liu, Hairston, Schrier, & Fan, 2011)                    | -46 | 42  | -4  | MNI        |
|                                                          | -42 | 52  | -6  | MNI        |
| (Wagner, Boswell, Kelley, & Heatherton, 2012)            | -27 | 36  | -12 | MNI        |
| (Diekhof, Falkai, & Gruber, 2011)                        | 21  | 21  | -21 | MNI        |
|                                                          | -24 | 27  | -21 | MNI        |
|                                                          | 15  | 18  | -18 | MNI        |
|                                                          | -21 | 39  | -18 | MNI        |
| (Berpohl et al., 2010)                                   | -30 | 42  | -9  | MNI        |
| (O'Doherty, Critchley, Deichmann, & Dolan, 2003)         | -39 | 42  | -15 | MNI        |
| (O'Doherty, Kringelbach, Rolls, Hornak, & Andrews, 2001) | 6   | 42  | -24 | Tal        |
|                                                          | -10 | 40  | -22 | Tal        |
|                                                          | -4  | 28  | -18 | Tal        |
|                                                          | 36  | 58  | -12 | Tal        |

## REFERENCES

- BERMPOHL, F., KAHNT, T., DALANAY, U., HAGELE, C., SAJONZ, B., WEGNER, T., . . . HEINZ, A. (2010). ALTERED REPRESENTATION OF EXPECTED VALUE IN THE ORBITOFRONTAL CORTEX IN MANIA. *HUM BRAIN MAPP*, *31*(7), 958-969. DOI: 10.1002/hbm.20909
- BUNZECK, N., DAYAN, P., DOLAN, R. J., & DUZEL, E. (2010). A COMMON MECHANISM FOR ADAPTIVE SCALING OF REWARD AND NOVELTY. *HUM BRAIN MAPP*, *31*(9), 1380-1394. DOI: 10.1002/hbm.20939
- BUNZECK, N., DOELLER, C. F., DOLAN, R. J., & DUZEL, E. (2012). CONTEXTUAL INTERACTION BETWEEN NOVELTY AND REWARD PROCESSING WITHIN THE MESOLIMBIC SYSTEM. *HUM BRAIN MAPP*, *33*(6), 1309-1324. DOI: 10.1002/hbm.21288
- DIACONESCU, A. O., JENSEN, J., WANG, H., WILLEIT, M., MENON, M., KAPUR, S., & MCINTOSH, A. R. (2011). ABERRANT EFFECTIVE CONNECTIVITY IN SCHIZOPHRENIA PATIENTS DURING APPETITIVE CONDITIONING. *FRONT HUM NEUROSCI*, *4*, 239. DOI: 10.3389/fnhum.2010.00239
- DIEKHOF, E. K., FALKAI, P., & GRUBER, O. (2011). THE ORBITOFRONTAL CORTEX AND ITS ROLE IN THE ASSIGNMENT OF BEHAVIOURAL SIGNIFICANCE. *NEUROPSYCHOLOGIA*, *49*(5), 984-991. DOI: 10.1016/j.neuropsychologia.2011.01.032
- LIU, X., HAIRSTON, J., SCHRIER, M., & FAN, J. (2011). COMMON AND DISTINCT NETWORKS UNDERLYING REWARD VALENCE AND PROCESSING STAGES: A META-ANALYSIS OF FUNCTIONAL NEUROIMAGING STUDIES. *NEUROSCI BIOBEHAV REV*, *35*(5), 1219-1236. DOI: 10.1016/j.neubiorev.2010.12.012
- O'DOHERTY, J., CRITCHLEY, H., DEICHMANN, R., & DOLAN, R. J. (2003). DISSOCIATING VALENCE OF OUTCOME FROM BEHAVIORAL CONTROL IN HUMAN ORBITAL AND VENTRAL PREFRONTAL CORTICES. *J NEUROSCI*, *23*(21), 7931-7939.
- O'DOHERTY, J., KRINGELBACH, M. L., ROLLS, E. T., HORNAK, J., & ANDREWS, C. (2001). ABSTRACT REWARD AND PUNISHMENT REPRESENTATIONS IN THE HUMAN ORBITOFRONTAL CORTEX. *NAT NEUROSCI*, *4*(1), 95-102. DOI: 10.1038/82959
- RIME, B. (2009). EMOTION ELICITS THE SOCIAL SHARING OF EMOTION: THEORY AND EMPIRICAL REVIEW. *EMOTION REVIEW*, *1*(1), 60-85. DOI: 10.1177/1754073908097189
- ROTHKIRCH, M., SCHMACK, K., SCHLAGENHAUF, F., & STERZER, P. (2012). IMPLICIT MOTIVATIONAL VALUE AND SALIENCE ARE PROCESSED IN DISTINCT AREAS OF ORBITOFRONTAL CORTEX. *NEUROIMAGE*, *62*(3), 1717-1725. DOI: 10.1016/j.neuroimage.2012.06.016
- SCHLAGENHAUF, F., STERZER, P., SCHMACK, K., BALLMAIER, M., RAPP, M., WRASE, J., . . . HEINZ, A. (2009). REWARD FEEDBACK ALTERATIONS IN UNMEDICATED SCHIZOPHRENIA PATIENTS: RELEVANCE FOR DELUSIONS. *BIOL PSYCHIATRY*, *65*(12), 1032-1039. DOI: 10.1016/j.biopsych.2008.12.016
- WALTER, H., HECKERS, S., KASSUBEK, J., ERK, S., FRASCH, K., & ABLER, B. (2010). FURTHER EVIDENCE FOR ABERRANT PREFRONTAL SALIENCE CODING IN SCHIZOPHRENIA. *FRONT BEHAV NEUROSCI*, *3*, 62. DOI: 10.3389/neuro.08.062.2009
